# Supplementary material
Source: publisher figshare collection journal article supplement (https://acs.figshare.com/ndownloader/files/21628638)
Supplement: Supplementary file 1 [file 21628638]

# Crude to olefins: effect of feedstock composition on coke formation in a bench-scale steam cracking furnace

*Moreno Geerts<sup>1</sup>, Nenad Ristic<sup>1</sup>, Marko Djokic<sup>1</sup>, Syam Ukkandath Aravindakshan<sup>1</sup>, Guy B. Marin<sup>1</sup>, Kevin M. Van Geem<sup>1,\*</sup>*

<sup>1</sup>Ghent University, Laboratory for Chemical Technology, Technologiepark 125, B-9052 Gent, Belgium.

\* Corresponding author: Technologiepark 125, B-9052 Zwijnaarde, Belgium;  
[Kevin.VanGeem@UGent.be](mailto:Kevin.VanGeem@UGent.be)

## Supporting information

### S1 Effluent analysis details

In the following three paragraphs, a detailed description of the two gas chromatographs for effluent analysis, i.e., GC×GC and RGA, is given.

#### S1.1 GC×GC

Reactor effluent is sampled on-line, i.e., during the experiment, at high temperature using a PLC controlled valve-based sampling system <sup>1</sup>. Condensation of heavy reaction products is avoided by keeping the valve system at a temperature of 573 K in the so-called sample box. A sample taken in the gas phase is directed to the Thermo Fisher Scientific Inc. (Waltham, USA) Trace 1310 GC × GC set-up (supplied by Interscience, Belgium) via a Split/Splitless injector kept at 593 K with a split flow of 100 ml min<sup>-1</sup>. PONA column (SGE Analytical Science, 50 m, 0.15 mm, 0.5 μm) is used as a first dimension column, while a BPX-50 (SGE Analytical Science, 7.5 m, 0.25 mm, 0.25 μm) is used as the second dimension column. Modulation is performed using a reversed-flow differential flow modulator <sup>2</sup> with a sample loop volume of 25 μl (SepSolve Analytics, United Kingdom). The modulation time is set to 2 s, with a flush time of 110 ms. A bare silica bleed line (7.7 m, 0.10 mm) is connected to another FID which serves as a check in case of a bleed of hydrocarbons from the sample loop during the refill stage. The initial temperature of the chromatographic oven is kept for 4 min at 233 K by injection of liquid nitrogen, before being increased to a temperature of 313 K with a heating rate of 4 K min<sup>-1</sup>. Subsequently, the temperature is increased to 573 K with a heating rate of 5 K min<sup>-1</sup>. Helium carrier gas flow of 0.5 ml min<sup>-1</sup> is used for the first dimension column, while 20 ml min<sup>-1</sup> is used for the second dimension column. The scan frequency of both FIDs, i.e., connected to the second dimension column and to the bleed

line, is 100 Hz. Hyperchrome Data System from Thermo Fisher Scientific Inc. (Waltham, USA) is used for acquisition and processing of results. The raw GC  $\times$  GC-FID data were exported to a NetCDF file and subsequently processed by GCImage™, LLC 2.6b4 software (Lincoln, Nebraska, USA).

## S1.2 RGA

Downstream of the TLE and the high temperature sampling section, the effluent stream is cooled to 320 K using a water-cooled heat exchanger. Water and heavy hydrocarbon products, i.e., a fraction of Pyrolysis Gasoline (Pygas) and Pyrolysis Fuel Oil (PFO), are condensed and collected in a knock-out drum. Uncondensed lighter reaction products are sampled on-line and directed to the so-called refinery gas analyser RGA (Interscience, Belgium) before sending the stream to the vent line. The RGA is equipped with three detectors working on parallel channels, i.e., two TCDs and an FID. The TCD detectors allow detection of N<sub>2</sub>, CO, CO<sub>2</sub>, H<sub>2</sub>, and the later hydrocarbons and hydrocarbons up to two carbon atoms, while the FID allows the detection of hydrocarbons up to four carbon atoms. Each detector is connected to a different chromatographic column. The RGA settings are presented in table A1.

| RGA                     |                                                                               |                                                              |                                                        |
|-------------------------|-------------------------------------------------------------------------------|--------------------------------------------------------------|--------------------------------------------------------|
| Detector                | FID                                                                           | TCD 1                                                        | TCD 2                                                  |
| Carrier gas             | He                                                                            | He                                                           | N <sub>2</sub>                                         |
| Pre-column              | Fused Silica Capillary Precolumn<br>(5 m $\times$ 0.53 mm $\times$ 3 $\mu$ m) | Packed Porous<br>Polymers Column<br>(0.25 m $\times$ 1.6 mm) | Packed Porous Polymers Column<br>(1 m $\times$ 1.6 mm) |
| Analytical<br>column(s) | Alumina bond<br>PLOT Column                                                   | Packed Porous<br>Polymers Column                             | Carbon Molecular<br>Sieve Column                       |

|                         |                                                            |                                                            |                |
|-------------------------|------------------------------------------------------------|------------------------------------------------------------|----------------|
|                         | (25 m × 0.53 mm × 10 µm)                                   | (1 m × 1.6 mm)<br>Molecular Sieve Column<br>(2 m × 1.6 mm) | (3 m × 1.6 mm) |
| Oven<br>temperature     | 333 (2 min) → 473 K (1.3 min)<br>(30 K min <sup>-1</sup> ) | 353 K                                                      | 353 K          |
| Detector<br>Temperature | 523 K                                                      | 383 K                                                      | 383 K          |

Table S1: RGA settings for on-line effluent measurements

| Elemental Analysis  | ASTM-D2887 (K)     |              |
|---------------------|--------------------|--------------|
|                     | NF                 | WRGO         |
| Carbon (wt.%)       | 85.4 ± 0.07        | 84.89 ± 0.15 |
| Hydrogen (wt.%)     | 14.6 ± 0.09        | 13.99 ± 0.09 |
| Nitrogen (wt.%)     | <0.01a             | 0.06 ± 0.01  |
| Sulfur (wt.%)       | <0.01a             | 1.07 ± 0.07  |
| Oxygen (wt.%)       | <0.01a             | <0.01a       |
| H/C (mol/mol)       | 2.06 ± 0.02        | 1.98 ± 0.02  |
| GC × GC             |                    |              |
| Paraffins (wt.%)    | 32.8 ± 1.3         | 25.4 ± 1.1   |
| Isoparaffins (wt.%) | 37.0 ± 1.1         | 36.1 ± 2.2   |
| Cycloalkanes (wt.%) | 17.8 ± 0.4         | 7.0 ± 0.4    |
| Aromatics (wt.%)    | 12.4 ± 0.4         | 28.6 ± 1.9   |
| Bio-markers (wt.%)  | <0.01 <sup>a</sup> | 2.9 ± 0.7    |
| Carbon number       | 5-12               | 5-45         |

a) Below detection limit of the method

Table S2: Feedstock analysis for naphtha fraction (NF) and wide-range gas oil (WRGO)

| Compound name      | NF   | WRGO |
|--------------------|------|------|
| Hydrogen           | 0.7  | 0.4  |
| Methane            | 8.8  | 9.6  |
| Ethane             | 2.8  | 5.1  |
| Ethylene           | 21.9 | 16.2 |
| Propane            | 0.4  | 1.1  |
| Propylene          | 14.1 | 12.1 |
| Acetylene          | 0.2  | 0.2  |
| Propadiene         | 0.1  | 0.1  |
| Isobutane          | 0.2  | 0.1  |
| N-butane           | 0.8  | 0.2  |
| Trans-2-butene     | 0.6  | 0.5  |
| N-butene           | 3.1  | 1.5  |
| Isobutene          | 2.0  | 1.7  |
| Cis-2-butene       | 0.4  | 0.4  |
| Methylacetylene    | 0.6  | 0.2  |
| 1,3-Butadiene      | 5.1  | 3.3  |
| Benzene (B)        | 2.7  | 3.4  |
| Toluene (T)        | 2.9  | 2.3  |
| M- & p-Xylene (X)  | 1.1  | 0.9  |
| O-xylene           | 0.6  | 0.8  |
| Pygas excl BTX     | 19.6 | 24.8 |
| Pyrolysis fuel oil | 11.3 | 14.1 |

Table S3: Effluent composition during naphtha fraction (NF) and wide-range gas oil (WRGO) experiment

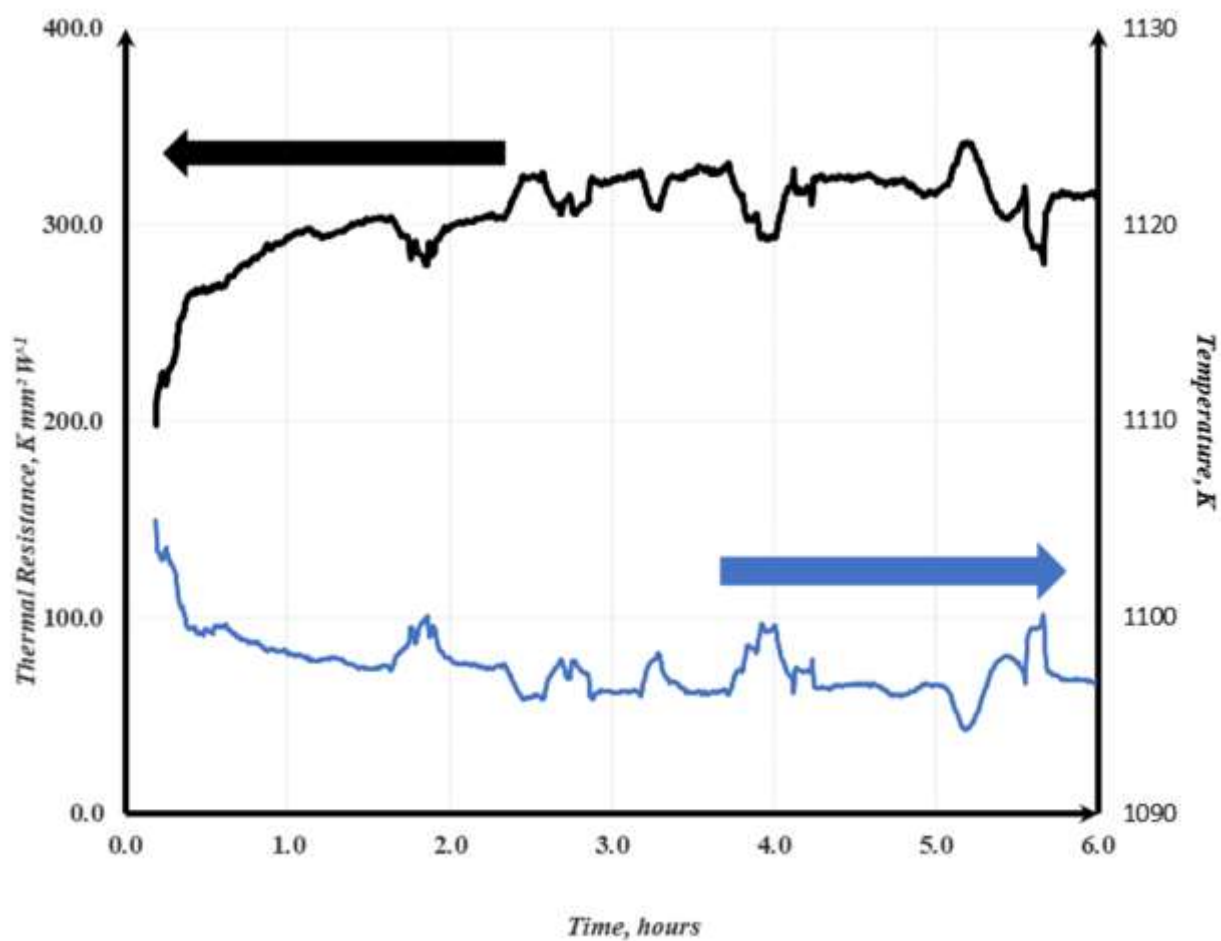

Figure S1: Reaction temperature and thermal resistance as a function of run time during a NF experiment with the movable thermocouple in radiant section zone III. Black (left axis) and blue (right axis) curves correspond to thermal resistance and process gas temperature in zone III, respectively .

## References

- (1) Ristic, N. D.; Djokic, M. R.; Van Geem, K. M.; Marin, G. B. On-line Analysis of Nitrogen Containing Compounds in Complex Hydrocarbon Matrixes. *Jove-Journal of Visualized Experiments* **2016**, DOI:10.3791/54236 10.3791/54236(114).
- (2) Griffith, J. F.; Winniford, W. L.; Sun, K. F.; Edam, R.; Luong, J. C. A reversed-flow differential flow modulator for comprehensive two-dimensional gas chromatography. *Journal of Chromatography A* **2012**, 1226, 116.
